# Supplementary material
Source: PubMed Central journal article supplement (PMC2889609)

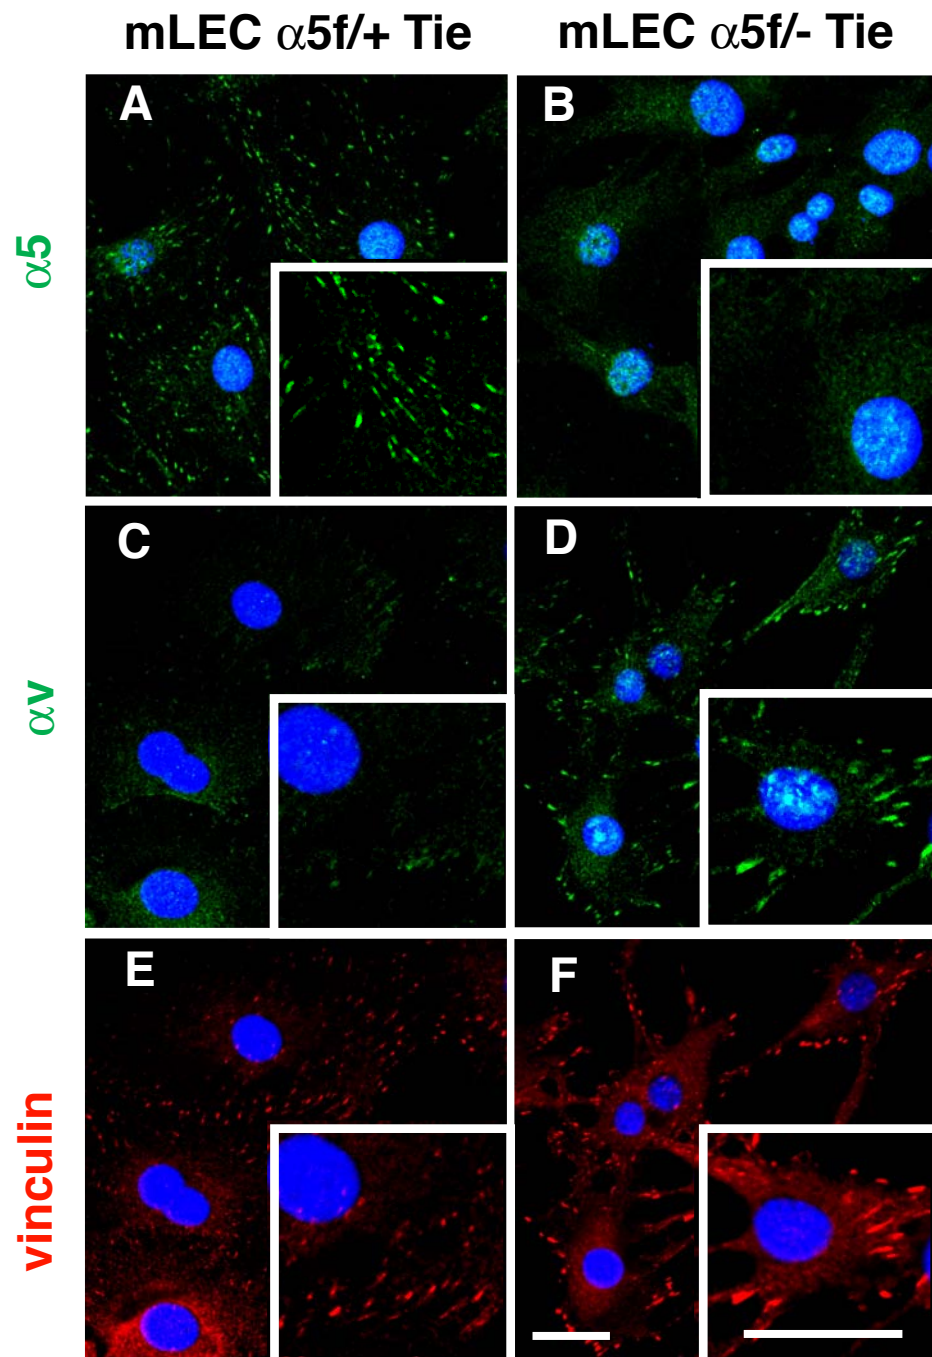

Supplement: supp_137.14.2439_049551FigS3.pdf [file supp_137.14.2439_049551FigS3.pdf]
